# Supplementary material for: A subset of brain neurons controls regurgitation in adult Drosophila melanogaster
Source: Oxford University Press journal article supplement (doi:10.1242/jeb.210724), 2019-01-01
Supplement: jeb210724supp.pdf [file jeb210724supp.pdf]

## SUPPLEMENTARY FIGURES

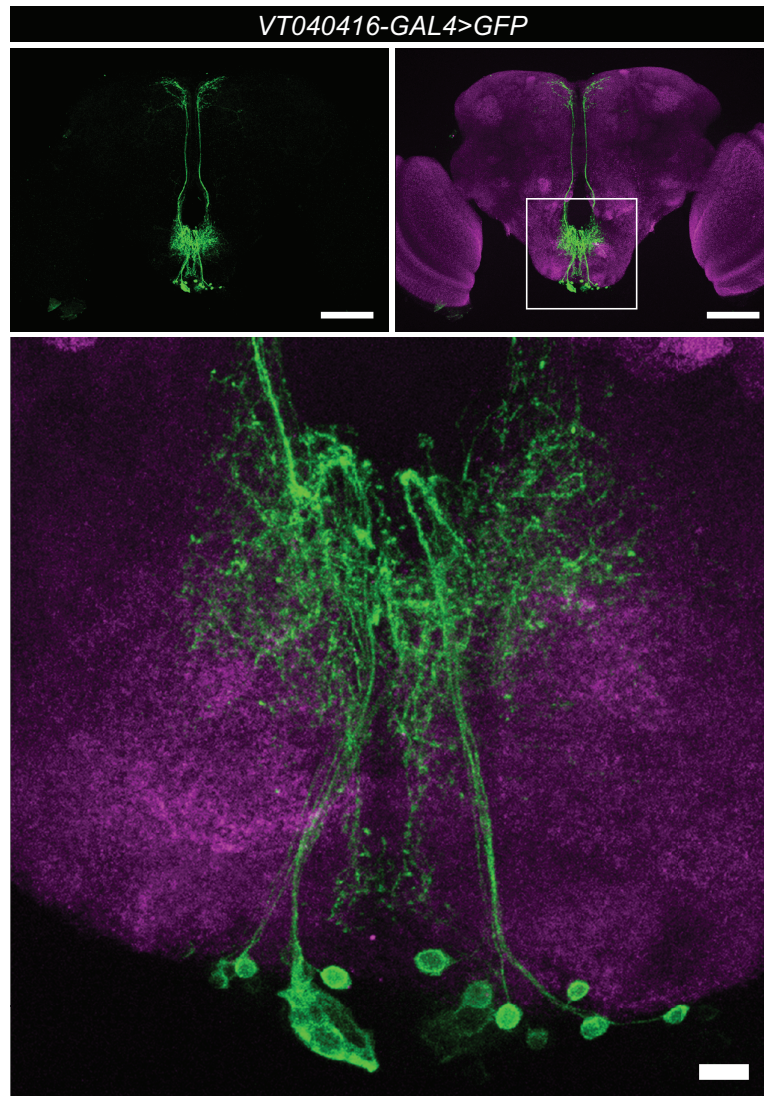

**Fig. S1. Expression of *VT040416-GAL4* in the brain.** (A) GFP expression in the adult *Drosophila* brain of *VT040416-GAL4>GFP* flies. Neuropil is stained with anti-nc82 (magenta). Scale bar: 100  $\mu\text{m}$  (top), 10  $\mu\text{m}$  (bottom).

**SUPPLEMENTARY TABLE****Table S1. Summary of PER results in the thermogenetic activation screen with 194 selected *VT-GAL4* and *Janelia-GAL4* lines.**

| Line number | Stock number | Inserted construct | PER (%) |
|-------------|--------------|--------------------|---------|
| 1           | BDSC 48723   | GMR16D02-GAL4      | 0       |
| 2           | BDSC 39332   | GMR65A10-GAL4      | 0       |
| 3           | BDSC 48522   | GMR12G03-GAL4      | 0       |
| 4           | BDSC 49238   | GMR10G07-GAL4      | 0       |
| 5           | BDSC 48891   | GMR20D04-GAL4      | 0       |
| 6           | BDSC 48755   | GMR17B03-GAL4      | 0       |
| 7           | BDSC 50020   | GMR38G08-GAL4      | 0       |
| 8           | BDSC 39898   | GMR75F02-GAL4      | 0       |
| 9           | BDSC 50326   | GMR47G06-GAL4      | 0       |
| 10          | BDSC 39288   | GMR64A07-GAL4      | 0       |
| 11          | BDSC 48527   | GMR12G12-GAL4      | 0       |
| 12          | BDSC 46435   | GMR60F03-GAL4      | 0       |
| 13          | BDSC 39316   | GMR64G05-GAL4      | 0       |
| 14          | BDSC 47335   | GMR23F01-GAL4      | 0       |
| 15          | BDSC 50039   | GMR39C07-GAL4      | 0       |
| 16          | BDSC 49700   | GMR32B04-GAL4      | 0       |
| 17          | BDSC 49004   | GMR22H09-GAL4      | 0       |
| 18          | BDSC 47839   | GMR10A11-GAL4      | 0       |
| 19          | BDSC 39885   | GMR75B11-GAL4      | 0       |
| 20          | BDSC 50296   | GMR47B12-GAL4      | 0       |
| 21          | BDSC 50034   | GMR39A11-GAL4      | 0       |
| 22          | BDSC 48367   | GMR81E10-GAL4      | 0       |
| 23          | BDSC 50291   | GMR47A12-GAL4      | 0       |
| 24          | BDSC 48515   | GMR12F05-GAL4      | 0       |
| 25          | BDSC 50297   | GMR47C03-GAL4      | 0       |
| 26          | BDSC 47253   | GMR94C10-GAL4      | 0       |
| 27          | BDSC 50207   | GMR44D07-GAL4      | 0       |
| 28          | VDRC 207671  | VT057287           | 0       |
| 29          | VDRC 206433  | VT057286           | 0       |
| 30          | VDRC 200916  | VT057280           | 0       |
| 31          | VDRC 200828  | VT057294           | 0       |
| 32          | VDRC 206712  | VT043663           | 0       |
| 33          | VDRC 205899  | VT043688           | 0       |
| 34          | VDRC 204490  | VT043670           | 0       |
| 35          | VDRC 202967  | VT043685           | 0       |
| 36          | VDRC 202712  | VT043658           | 0       |
| 37          | VDRC 201610  | VT043686           | 0       |
| 38          | VDRC 201134  | VT043678           | 0       |
| 39          | VDRC 200755  | VT043699           | 0       |
| 40          | VDRC 201193  | VT043701           | 0       |
| 41          | VDRC 200285  | VT043698           | 0       |
| 42          | VDRC 207582  | VT046252           | 0       |

|    |             |          |   |
|----|-------------|----------|---|
| 43 | VDRC 205020 | VT056866 | 0 |
| 44 | VDRC 203856 | VT023747 | 0 |
| 45 | VDRC 206542 | VT029749 | 0 |
| 46 | VDRC 204934 | VT043645 | 0 |
| 47 | VDRC 206065 | VT039485 | 0 |
| 48 | VDRC 207679 | VT063218 | 0 |
| 49 | VDRC 207662 | VT042573 | 0 |
| 50 | VDRC 204287 | VT043697 | 0 |
| 51 | VDRC 201032 | VT017247 | 0 |
| 52 | VDRC 203341 | VT031562 | 0 |
| 53 | VDRC 203183 | VT010262 | 0 |
| 54 | VDRC 207777 | VT021853 | 0 |
| 55 | VDRC 207746 | VT062774 | 0 |
| 56 | VDRC 204334 | VT037601 | 0 |
| 57 | VDRC 207914 | VT017745 | 0 |
| 58 | VDRC 204710 | VT048649 | 0 |
| 59 | VDRC 202764 | VT058427 | 0 |
| 60 | VDRC 204652 | VT023783 | 0 |
| 61 | VDRC 204475 | VT022100 | 0 |
| 62 | VDRC 205316 | VT041269 | 0 |
| 63 | VDRC 201067 | VT034804 | 0 |
| 64 | VDRC 204569 | VT026174 | 0 |
| 65 | VDRC 201918 | VT050226 | 0 |
| 66 | VDRC 205643 | VT063191 | 0 |
| 67 | VDRC 200494 | VT002857 | 0 |
| 68 | VDRC 201761 | VT014604 | 0 |
| 69 | VDRC 203479 | VT026020 | 0 |
| 70 | VDRC 208182 | VT038884 | 0 |
| 71 | VDRC 202173 | VT008279 | 0 |
| 72 | VDRC 204924 | VT032280 | 0 |
| 73 | VDRC 203610 | VT048140 | 0 |
| 74 | VDRC 201756 | VT002210 | 0 |
| 75 | VDRC 201439 | VT040540 | 0 |
| 76 | VDRC 201230 | VT015784 | 0 |
| 77 | VDRC 205866 | VT007768 | 0 |
| 78 | VDRC 204711 | VT048651 | 0 |
| 79 | VDRC 204949 | VT048656 | 0 |
| 80 | VDRC 205136 | VT039361 | 0 |
| 81 | VDRC 207835 | VT016057 | 0 |
| 82 | VDRC 200076 | VT012300 | 0 |
| 83 | VDRC 205765 | VT009667 | 0 |
| 84 | VDRC 202860 | VT027938 | 0 |
| 85 | VDRC 200626 | VT037726 | 0 |
| 86 | VDRC 202148 | VT049374 | 0 |
| 87 | VDRC 201299 | VT058699 | 0 |

|     |             |          |   |
|-----|-------------|----------|---|
| 88  | VDRC 207526 | VT022224 | 0 |
| 89  | VDRC 206883 | VT015971 | 0 |
| 90  | VDRC 203133 | VT007359 | 0 |
| 91  | VDRC 206930 | VT026759 | 0 |
| 92  | VDRC 202180 | VT008480 | 0 |
| 93  | VDRC 202959 | VT028872 | 0 |
| 94  | VDRC 206202 | VT026782 | 0 |
| 95  | VDRC 204216 | VT043928 | 0 |
| 96  | VDRC 200348 | VT038814 | 0 |
| 97  | VDRC 205738 | VT056808 | 0 |
| 98  | VDRC 206660 | VT013039 | 0 |
| 99  | VDRC 202186 | VT008489 | 0 |
| 100 | VDRC 206852 | VT041658 | 0 |
| 101 | VDRC 208087 | VT030526 | 0 |
| 102 | VDRC 201715 | VT017415 | 0 |
| 103 | VDRC 206982 | VT026753 | 0 |
| 104 | VDRC 203106 | VT016969 | 0 |
| 105 | VDRC 203875 | VT050233 | 0 |
| 106 | VDRC 201792 | VT025779 | 0 |
| 107 | VDRC 203086 | VT007709 | 0 |
| 108 | VDRC 203039 | VT014724 | 0 |
| 109 | VDRC 202909 | VT007767 | 0 |
| 110 | VDRC 201324 | VT049500 | 0 |
| 111 | VDRC 201212 | VT006395 | 0 |
| 112 | VDRC 203757 | VT007747 | 0 |
| 113 | VDRC 200786 | VT039997 | 0 |
| 114 | VDRC 200755 | VT043699 | 0 |
| 115 | VDRC 204493 | VT044843 | 0 |
| 116 | VDRC 202191 | VT003238 | 0 |
| 117 | VDRC 203180 | VT009835 | 0 |
| 118 | VDRC 204287 | VT043697 | 0 |
| 119 | VDRC 201907 | VT040033 | 0 |
| 120 | VDRC 203008 | VT010054 | 0 |
| 121 | VDRC 206753 | VT029822 | 0 |
| 122 | VDRC 207897 | VT015256 | 0 |
| 123 | VDRC 207668 | VT054815 | 0 |
| 124 | VDRC 204630 | VT044175 | 0 |
| 125 | VDRC 202663 | VT046307 | 0 |
| 126 | VDRC 207554 | VT058854 | 0 |
| 127 | VDRC 206455 | VT045791 | 0 |
| 128 | VDRC 203935 | VT016848 | 0 |
| 129 | VDRC 202538 | VT032907 | 0 |
| 130 | VDRC 203984 | VT062245 | 0 |
| 131 | VDRC 205034 | VT060196 | 0 |
| 132 | VDRC 207789 | VT041298 | 0 |

|     |             |               |         |
|-----|-------------|---------------|---------|
| 133 | VDRC 206418 | VT049371      | 0       |
| 134 | VDRC 203267 | VT029203      | 0       |
| 135 | VDRC 203267 | VT029203      | 1.5625  |
| 136 | BDSC 26263  | UAS-dTrpA1    | 3.84615 |
| 137 | VDRC 206660 | VT013039      | 4.6875  |
| 138 | BDSC 49961  | GMR37F05-GAL4 | 5       |
| 139 | BDSC 50146  | GMR42B10-GAL4 | 5       |
| 140 | BDSC 38810  | GMR52A06-GAL4 | 5       |
| 141 | BDSC 39973  | GMR77F07-GAL4 | 5       |
| 142 | BDSC 40458  | GMR86D08-GAL4 | 5       |
| 143 | VDRC 201830 | VT043635      | 5       |
| 144 | VDRC 207088 | VT050546      | 5       |
| 145 | VDRC 207914 | VT017745      | 5       |
| 146 | VDRC 202842 | VT059229      | 5       |
| 147 | VDRC 206712 | VT043663      | 5       |
| 148 | VDRC 205377 | VT049112      | 5       |
| 149 | VDRC 203901 | VT063556      | 5       |
| 150 | VDRC 201617 | VT049245      | 5       |
| 151 | VDRC 206420 | VT049570      | 5       |
| 152 | VDRC 204187 | VT062763      | 5       |
| 153 | VDRC 204778 | VT028452      | 5       |
| 154 | VDRC 200252 | VT034795      | 5       |
| 155 | VDRC 201744 | VT056509      | 5       |
| 156 | VDRC 208860 | VT030527      | 5       |
| 157 | VDRC 204797 | VT030528      | 5       |
| 158 | VDRC 204931 | VT038156      | 5       |
| 159 | VDRC 202537 | VT032906      | 5       |
| 160 | VDRC 204703 | VT046912      | 5       |
| 161 | VDRC 200084 | VT019428      | 5       |
| 162 | VDRC 206523 | VT020016      | 5       |
| 163 | VDRC 203128 | VT021366      | 5       |
| 164 | VDRC 201412 | VT045153      | 5       |
| 165 | VDRC 207611 | VT037802      | 5       |
| 166 | VDRC 208087 | VT030526      | 7.8125  |
| 167 | VDRC 204949 | VT048656      | 9.375   |
| 168 | BDSC 47826  | GMR88C04-GAL4 | 10      |
| 169 | VDRC 202269 | VT025803      | 10      |
| 170 | VDRC 203052 | VT017205      | 10      |
| 171 | VDRC 200911 | VT041424      | 10      |
| 172 | VDRC 201230 | VT015784      | 12.5    |
| 173 | BDSC 49396  | GMR53D04-GAL4 | 15      |
| 174 | VDRC 205453 | VT036779      | 15      |
| 175 | VDRC 203966 | VT040981      | 15      |
| 176 | VDRC 205806 | VT000456      | 15      |
| 177 | VDRC 200309 | VT050245      | 15      |

|     |             |               |        |
|-----|-------------|---------------|--------|
| 178 | VDRC 206939 | VT037470      | 15     |
| 179 | VDRC 204317 | VT030091      | 15     |
| 180 | BDSC 50149  | GMR42C05-GAL4 | 20     |
| 181 | BDSC 50386  | GMR48G07-GAL4 | 20     |
| 182 | BDSC 48967  | GMR22B01-GAL4 | 20     |
| 183 | VDRC 204407 | VT059796      | 20     |
| 184 | VDRC 203800 | VT038168      | 20     |
| 185 | VDRC 206142 | VT058927      | 20     |
| 186 | VDRC 204139 | VT017376      | 21.875 |
| 187 | VDRC 204934 | VT043645      | 25     |
| 188 | VDRC 203186 | VT013509      | 25     |
| 189 | BDSC 48016  | GMR9A03-GAL4  | 30     |
| 190 | VDRC 20055  | VT064520      | 30     |
| 191 | VDRC 203984 | VT062245      | 40.625 |
| 192 | VDRC 204969 | VT040416      | 42.85  |
| 193 | VDRC 202699 | VT041723      | 54.117 |
| 194 | VDRC 203800 | VT038168      | 55     |
| 195 | BDSC 39951  | GMR77B08-GAL4 | 65     |

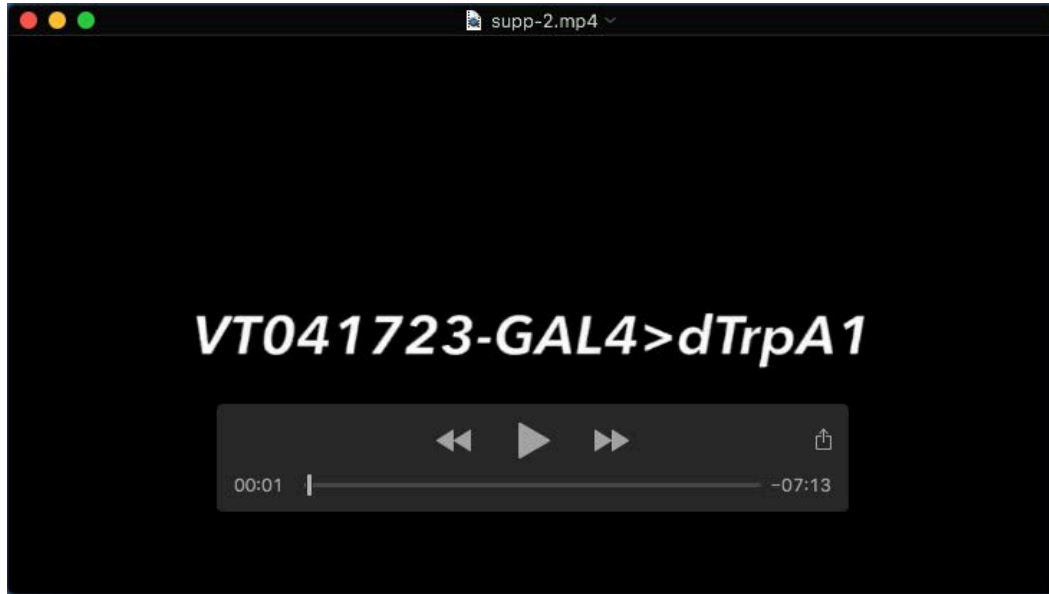

**Movie 1. Thermogenetic activation of *VT041723-GAL4* neurons induces proboscis holding.**

Proboscis holding observed upon placing a *VT041723-GAL4>dTrpA1* fed female fly on a 31°C heated block. Note that the fly fully extended its proboscis and held it in that position for the whole 7-minute recording time.

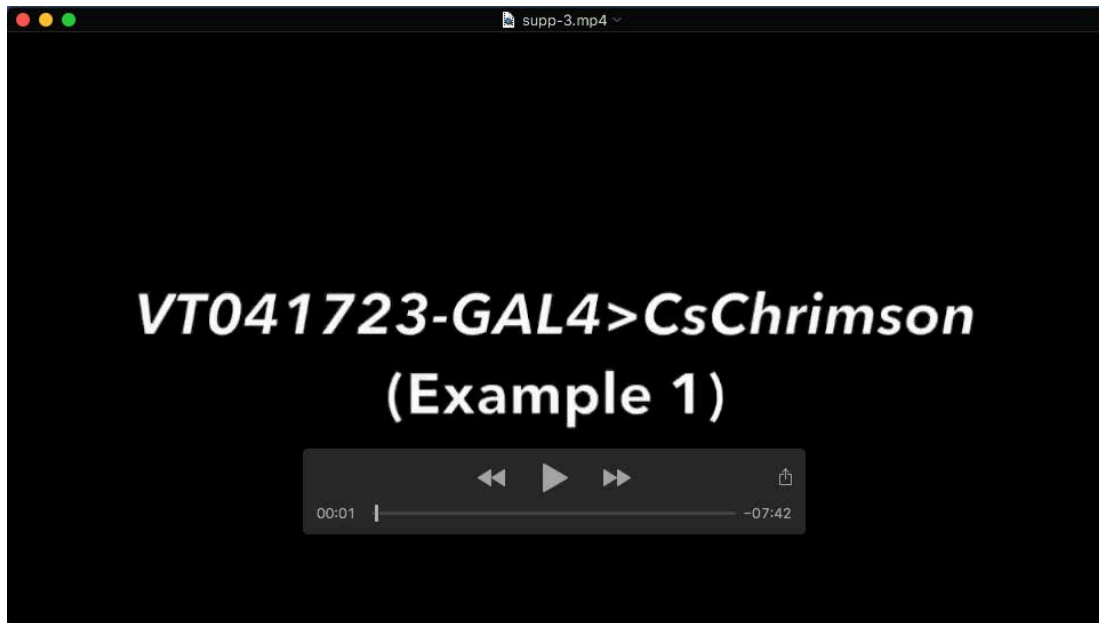

**Movie 2. Optogenetic activation of *VT041723-GAL4* neurons induces proboscis holding.**

Proboscis holding observed upon activation red LED exposure (at time 0.15 seconds) on a *VT041723-GAL4>CsChrimson* fed female fly. Note that the fly partially extended its proboscis and held it in that position for the whole 7-minute recording time.



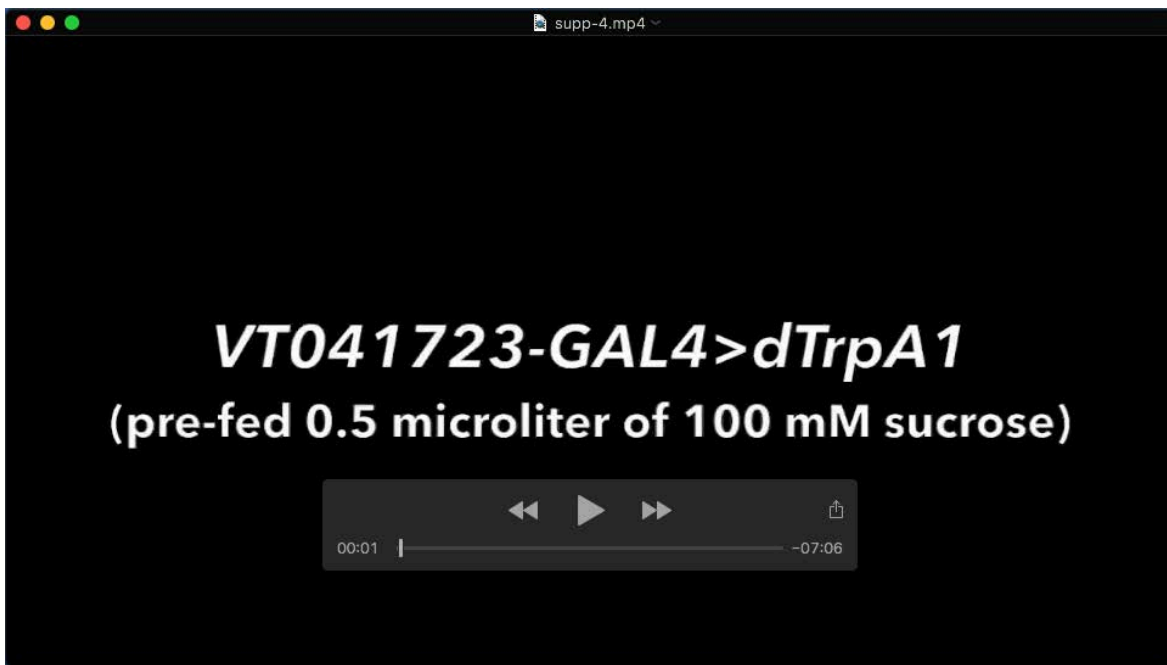

**Movie 3. Thermogenetic activation of *VT041723-GAL4* neurons induces regurgitation after ingestion.** Regurgitation observed upon placing a *VT041723-GAL4>dTrpA1* female fly pre-fed with 0.5  $\mu$ L of 100 mM sucrose on a 31°C heated block. Note that the fly held the proboscis with a bubble at the tip for the whole 7-minute recording time.
